# Supplementary material for: Efficient construction of core/double-shelled structured AP@nano-graphite@F2603 energetic microcapsules with low sensitivity and hygroscopicity
Source: Royal Society of Chemistry journal article supplement (doi:10.1039/d4nr04234d), 2025-01-01
Supplement: d4nr04234d1.pdf [file d4nr04234d1.pdf]

## Supplementary Information

### **Efficient Construction Core/Double-shelled Structured AP@nano-graphite@F<sub>2603</sub> Energetic Microcapsules with Low Sensitivity and Hygroscopicity**

Jiahao Yu<sup>1</sup>, Yong Kou<sup>1</sup>, Lei Xiao<sup>1</sup>, Qiangqiang Lu<sup>1</sup>, Xuran Xu<sup>1</sup>, Junqing Yang<sup>1</sup>, Wei Jiang<sup>1</sup>, Gazi Hao<sup>1\*</sup>

<sup>1</sup> School of Chemistry and Chemical Engineering, Nanjing University of Science and Technology, Nanjing 210094, China;

\* Corresponding author: hgznjust1989@163.com (Gazi Hao)

The  $F_{2603}$  polymer chain was constructed initially using difluoroethylene and hexafluoropropylene in a molar ratio of 4:1, with a chain length of 5. A spherical AP cluster with a radius of 10 Å was then constructed using the MS software base modeling function and placed at the center of a cubic lattice with a side length of 50 Å. The AP cluster was placed in the center of the body of the cubic lattice. A spherical cluster of C atoms with a radius of 13 Å was constructed using the MS software base modeling function. The core (10 Å) was then manually removed, resulting in a spherical shell-shaped monolayer of carbon atoms. These atoms were subsequently transferred to the spherical AP. Finally, 0.5 g/cm<sup>3</sup> of  $F_{2603}$  rubber molecules were added to the vacuum space of the cubic lattice using the AC module, ensuring uniform distribution. The initial model is finally obtained.

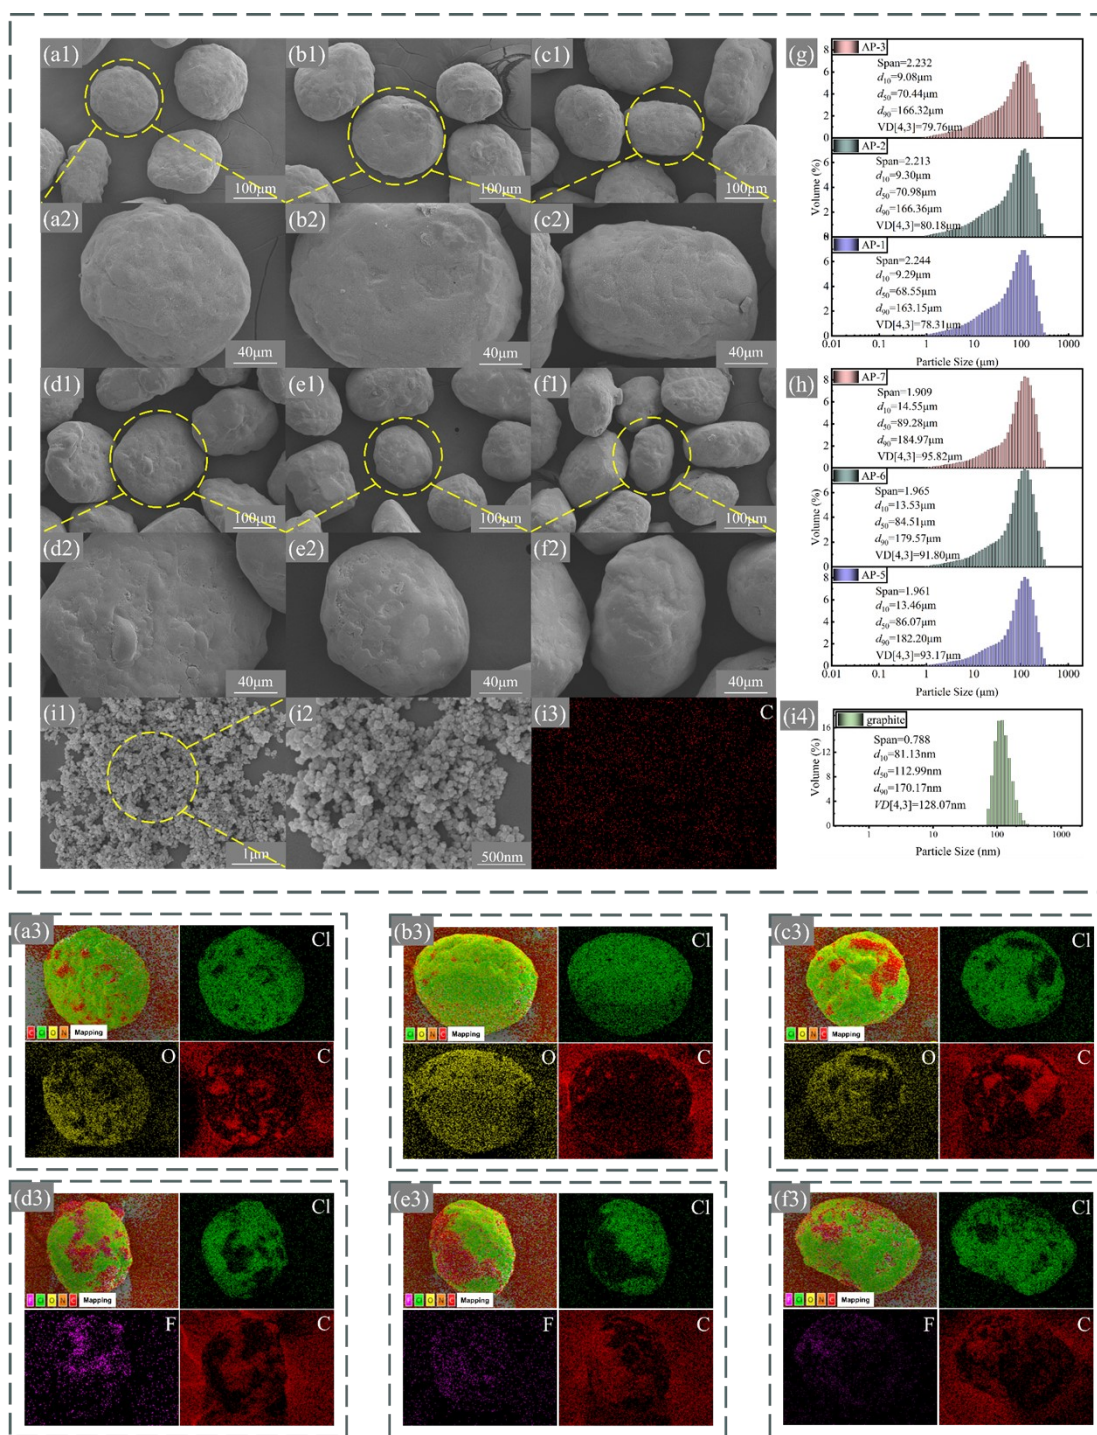

Figure S1. SEM, EDS and particle size analysis of AP-based energetic microcapsules and graphite:

(a1, a2, a3) AP-1; (b1, b2, b3) AP-2; (c1, c2, c3) AP-3; (d1, d2, d3) AP-5; (e1, e2, e3) AP-6; (f1, f2, f3) AP-7; (g, h) particle size; (i1, i2, i3, i4) graphite.

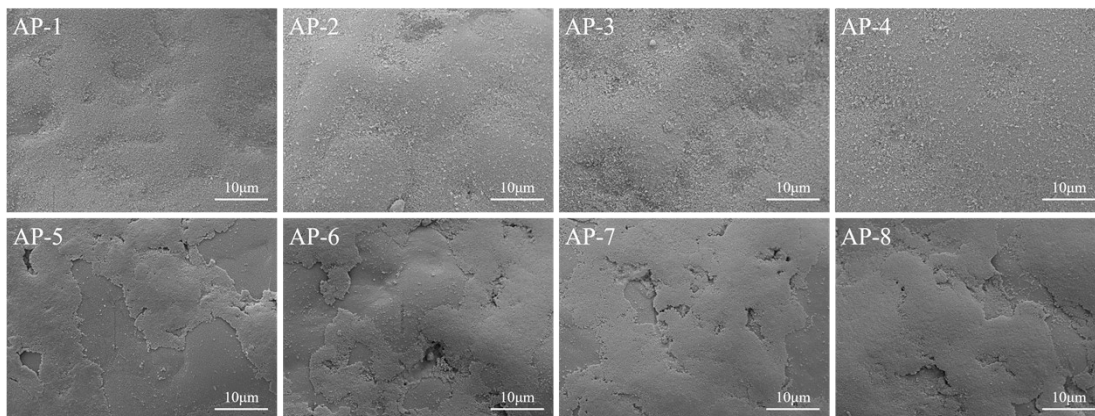

Figure S2. SEM analysis of AP-based energetic microcapsules.

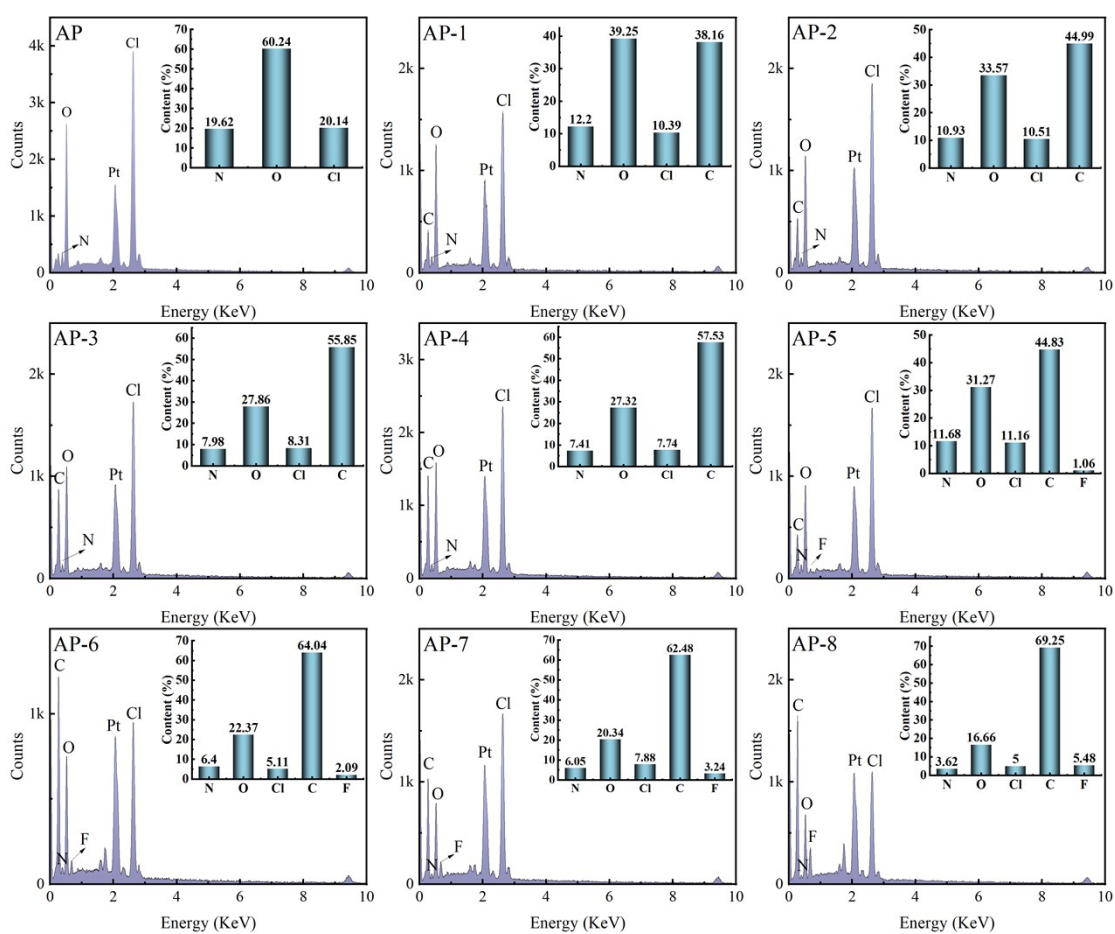

Figure S3. EDS analysis of the different AP-based energetic microcapsules.



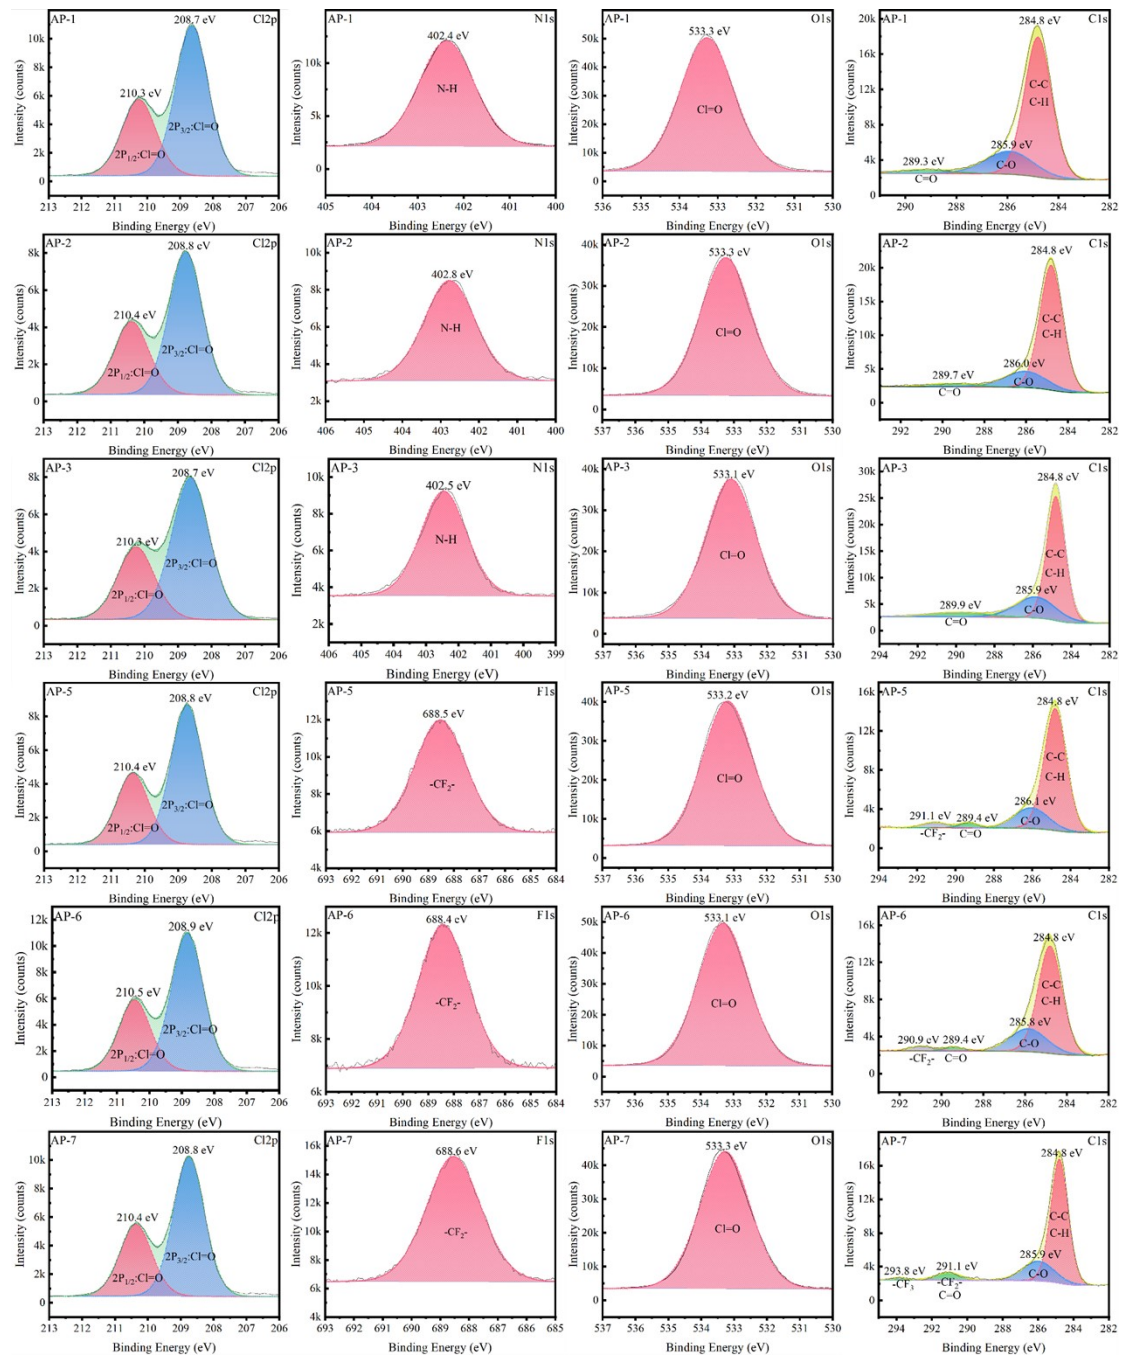

Figure S4. XPS spectra of AP-based energetic microcapsules.

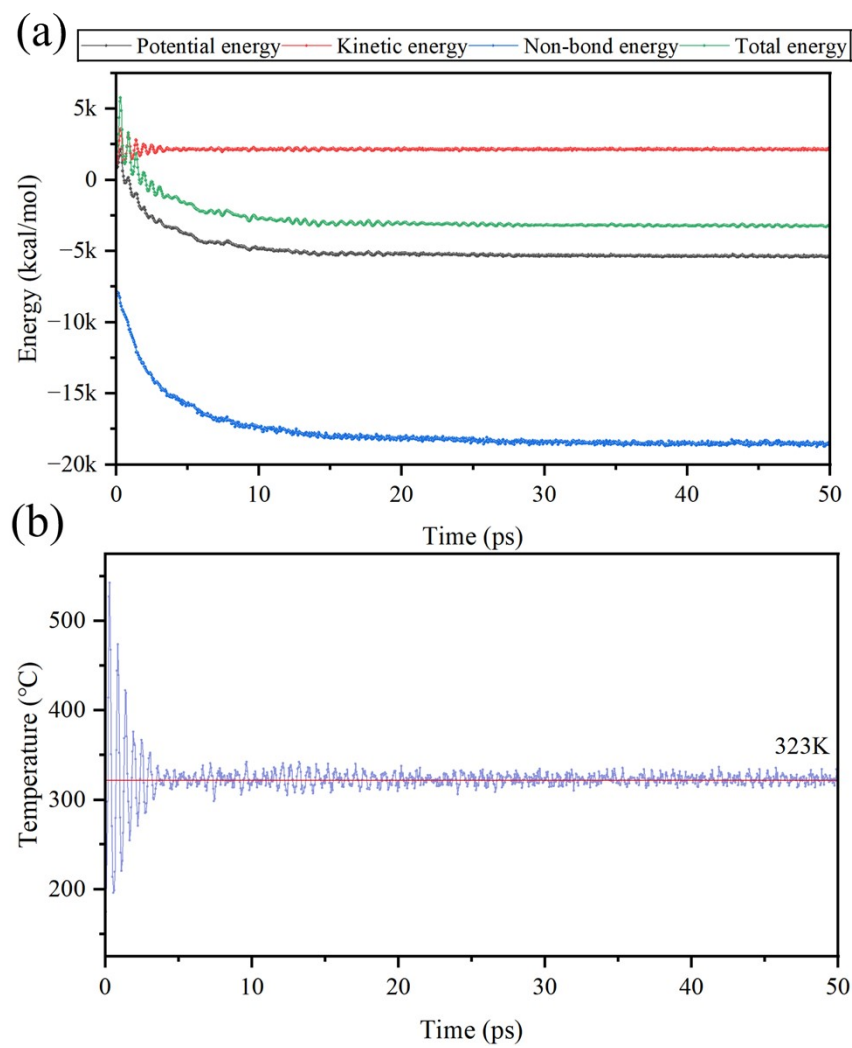

Figure S5. Forcite dynamics energy (a) and forcite dynamics temperature (b) of  $F_{2603}$  coated on AP@nano-graphite.

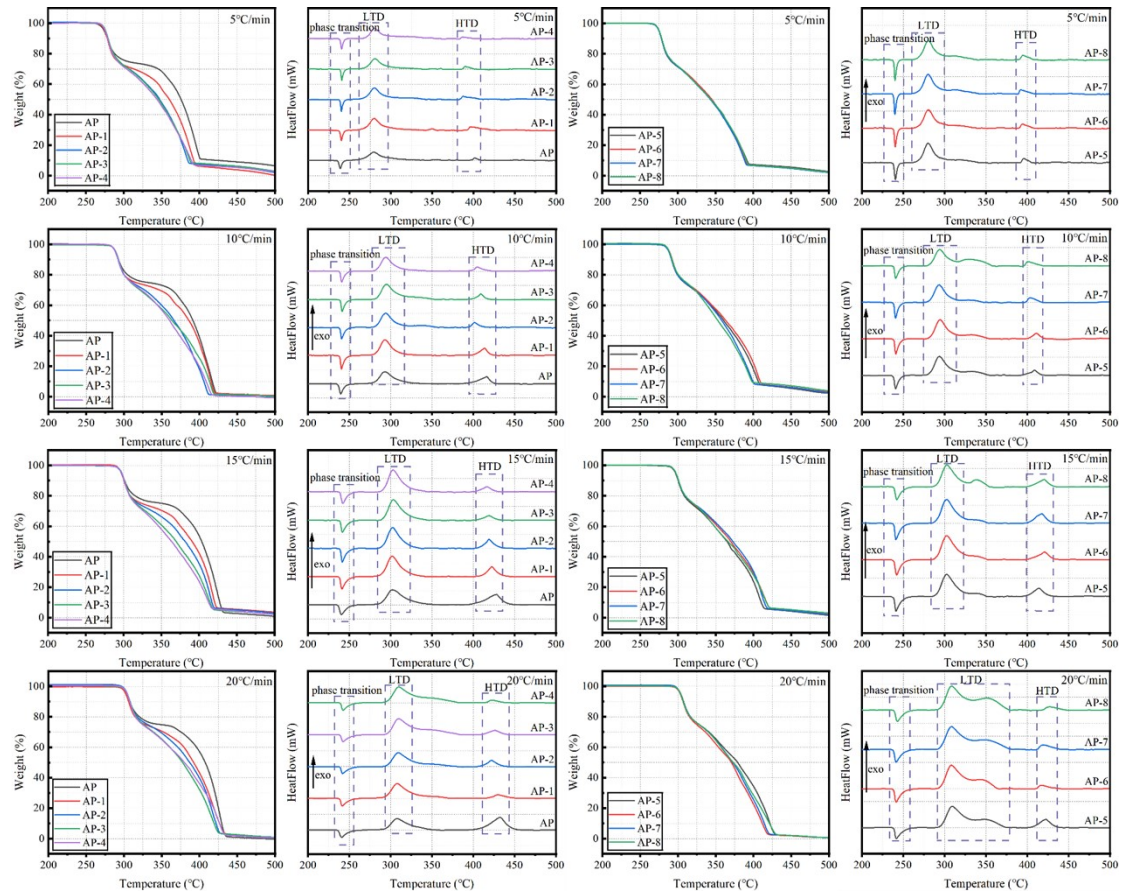

Figure S6. Thermal analysis of AP-based energetic microcapsules.

Table S1. Linear fitting formula for  $\ln(\beta/T_p^2) \sim 1000/T_p$  of AP-based energetic microcapsules.

| Sample | Linear fitting equation     | $R^2$   |
|--------|-----------------------------|---------|
| AP     | $y = -19.00728x + 16.75819$ | 0.9932  |
| AP-1   | $y = -17.99091x + 15.46039$ | 0.9965  |
| AP-2   | $y = -15.84261x + 12.63712$ | 0.98055 |
| AP-3   | $y = -15.2785x + 11.71153$  | 0.99378 |
| AP-4   | $y = -16.20752x + 13.1872$  | 0.99421 |
| AP-5   | $y = -17.0034x + 14.28432$  | 0.999   |
| AP-6   | $y = -17.35178x + 14.62493$ | 0.99846 |
| AP-7   | $y = -17.49362x + 15.01972$ | 0.98571 |
| AP-8   | $y = -18.05261x + 15.74125$ | 0.9532  |

Table S2. Thermodynamic/kinetic parameters of thermal decomposition for AP-based energetic microcapsules.

| Sample | $E_a$<br>kJ/mol | $\ln A$<br>$s^{-1}$ | $k(T_p)$<br>$s^{-1}$ | $\Delta H^\ddagger$<br>kJ/mol | $\Delta S^\ddagger$<br>J/mol | $\Delta G^\ddagger$<br>kJ/mol |
|--------|-----------------|---------------------|----------------------|-------------------------------|------------------------------|-------------------------------|
| AP     | 158.0           | 22.5                | 0.0121               | 152.2                         | -64.9                        | 198.0                         |
| AP-1   | 149.6           | 21.2                | 0.0119               | 143.7                         | -76.1                        | 197.2                         |
| AP-2   | 131.7           | 18.2                | 0.0104               | 125.9                         | -100.5                       | 195.9                         |
| AP-3   | 127.0           | 17.3                | 0.0100               | 121.2                         | -108.6                       | 197.1                         |
| AP-4   | 134.7           | 18.8                | 0.0106               | 129.0                         | -95.8                        | 195.5                         |
| AP-5   | 141.4           | 19.9                | 0.0119               | 135.6                         | -86.3                        | 195.8                         |
| AP-6   | 144.3           | 20.3                | 0.0115               | 138.4                         | -83.3                        | 196.8                         |
| AP-7   | 145.4           | 20.7                | 0.0120               | 139.7                         | -79.9                        | 195.3                         |
| AP-8   | 150.1           | 20.4                | 0.0122               | 144.3                         | -73.7                        | 195.7                         |

Table S3. Flowability data parameters of AP-based energetic microcapsules.

| Samples | Angle of<br>repose ( $^\circ$ ) | Shear angle<br>( $^\circ$ ) | Compressibil<br>ity (%) | Homogeneity<br>(a.u.) | Flow index<br>(a.u.) |
|---------|---------------------------------|-----------------------------|-------------------------|-----------------------|----------------------|
| AP      | 23.11                           | 25.57                       | 12.00                   | 9.70                  | 88.00                |
| AP-1    | 32.00                           | 27.44                       | 14.00                   | 9.31                  | 84.00                |
| AP-2    | 33.29                           | 28.50                       | 14.00                   | 9.62                  | 84.00                |
| AP-3    | 32.61                           | 29.36                       | 14.00                   | 9.77                  | 84.00                |
| AP-4    | 30.64                           | 29.08                       | 14.00                   | 9.67                  | 85.00                |
| AP-5    | 29.27                           | 28.35                       | 12.00                   | 7.70                  | 87.50                |
| AP-6    | 26.41                           | 27.91                       | 13.00                   | 7.45                  | 89.00                |
| AP-7    | 33.11                           | 27.88                       | 12.00                   | 7.32                  | 86.00                |
| AP-8    | 35.32                           | 29.06                       | 10.00                   | 7.13                  | 86.00                |

Table S4. Jet-ability data parameters of AP-based energetic microcapsules.

| Samples | Flow | Angle of | Angle of | Dispersibility | Jet |
|---------|------|----------|----------|----------------|-----|
|---------|------|----------|----------|----------------|-----|



---

|      | index(a.u.) | rupture (°) | difference (°) | (%)  | Index (a.u.) |
|------|-------------|-------------|----------------|------|--------------|
| AP   | 88.00       | 21.88       | 1.23           | 4.33 | 52.00        |
| AP-1 | 84.00       | 24.69       | 7.31           | 3.33 | 54.52        |
| AP-2 | 84.00       | 25.02       | 8.27           | 1.67 | 55.50        |
| AP-3 | 84.00       | 24.31       | 8.30           | 2.67 | 56.00        |
| AP-4 | 85.00       | 23.56       | 7.05           | 2.33 | 55.25        |
| AP-5 | 87.50       | 24.41       | 4.86           | 6.67 | 54.00        |
| AP-6 | 89.00       | 22.61       | 3.80           | 5.67 | 52.00        |
| AP-7 | 86.00       | 24.68       | 8.43           | 3.67 | 56.00        |
| AP-8 | 86.00       | 25.44       | 9.85           | 2.67 | 57.00        |

---
